# Supplementary material for: Investigating Seawater Intrusion in Republic of South Africa’s Heuningnes, Cape Agulhas Using Hydrogeochemistry and Seawater Fraction Techniques
Source: MDPI journal article supplement (doi:10.3390/w15112141), 2023-06-05
Supplement: s1 [file s1]

**Table S1:** Isotopic composition of groundwater and rainfall samples.

| Sample Name     | Wet Season                |                              | Dry Season                |                              | Aquifer System                         |
|-----------------|---------------------------|------------------------------|---------------------------|------------------------------|----------------------------------------|
|                 | $\delta^2\text{H}$ , in ‰ | $\delta^{18}\text{O}$ , in ‰ | $\delta^2\text{H}$ , in ‰ | $\delta^{18}\text{O}$ , in ‰ |                                        |
| BH4             | -13.7                     | -3.3                         | -13.0                     | -2.5                         | Bokkoved (Intergranular)               |
| BH6             | -10.2                     | -2.4                         | -11.6                     | -2.6                         | Bokkoved (Intergranular)               |
| BH9             | -21.0                     | -5.1                         | -21.2                     | -4.9                         | TMG (Fractured)                        |
| BH 11           | -19.9                     | -4.6                         | -19.9                     | -4.5                         | TMG (Fractured)                        |
| BH15            | -24.3                     | -5.3                         | -24.5                     | -5.3                         | TMG (Fractured)                        |
| BH16            | -17.5                     | -4.2                         | -24.4                     | -5.0                         | TMG (Fractured)                        |
| BH20a           | -16.5                     | -4.2                         | -16.3                     | -3.9                         | Bredasdorp (Intergranular & fractured) |
| BH20b           | -16.9                     | -4.0                         | -17.4                     | -4.2                         | Bredasdorp (Intergranular & fractured) |
| BH20c           | -16.5                     | -4.2                         | -17.2                     | -4.2                         | Bredasdorp (Intergranular & fractured) |
| BH21            | -21.3                     | -5.0                         | -21.8                     | -5.1                         | TMG (Fractured)                        |
| BH26            | -23.3                     | -5.1                         | -25.0                     | -5.1                         | Bokkoved (Intergranular)               |
| BH28            | -25.6                     | -5.5                         | -25.9                     | -5.5                         | Bokkoved (Intergranular)               |
| BH5             | -15.7                     | -3.5                         | -12.6                     | -2.7                         | Bokkoved (Intergranular)               |
| BH7             | -11.5                     | -2.6                         | -12.3                     | -2.6                         | Bokkoved (Intergranular)               |
| BH8             | -9.4                      | -2.7                         | -10.5                     | -2.5                         | Bokkoved (Intergranular)               |
| BH10            | -14.7                     | -3.8                         | -19.7                     | -4.1                         | TMG (Fractured)                        |
| BH12            | -20.3                     | -4.7                         | -20.1                     | -4.5                         | TMG (Fractured)                        |
| BH17            | -22.9                     | -5.0                         | -20.3                     | -4.5                         | TMG (Fractured)                        |
| BH19            | -12.7                     | -3.8                         | -22.7                     | -4.7                         | TMG (Fractured)                        |
| BH22            | -21.2                     | -5.0                         | -20.7                     | -4.9                         | TMG (Fractured)                        |
| BH23            | -13.1                     | -4.0                         | -11.8                     | -3.3                         | TMG (Fractured)                        |
| BH25            | 1.6                       | -0.4                         | -3.3                      | -0.9                         | TMG (Fractured)                        |
| BH27            | -22.9                     | -4.7                         | -22.8                     | -4.9                         | Bokkoved (Intergranular)               |
| BH29            | -23.2                     | -5.1                         | -23.6                     | -5.1                         | Bokkoved (Intergranular)               |
| BH24            | -22.5                     | -4.8                         | -10.9                     | -2.7                         | TMG (Fractured)                        |
| Tussen rainfall | -23.5                     | -4.7                         | -28.2                     | -5.0                         | -                                      |
| Modder rainfall | -20.6                     | -4.7                         | -23.2                     | -4.5                         | -                                      |
| Seawater        | 0.0                       | 0.2                          | -                         | -                            | -                                      |
